# Supplementary material for: Analytical and clinical validation of a microbial cell-free DNA sequencing test for infectious disease
Source: Springer Nature journal article supplement (doi:10.1038/s41564-018-0349-6), 2019-02-11
Supplement: 41564_2018_349_MOESM1_ESM.pdf [file 41564_2018_349_MOESM1_ESM.pdf]

In the format provided by the authors and unedited.

# Analytical and clinical validation of a microbial cell-free DNA sequencing test for infectious disease

Timothy A. Blauwkamp <sup>1,3\*</sup>, Simone Thair<sup>2,3</sup>, Michael J. Rosen<sup>1</sup>, Lily Blair<sup>1</sup>, Martin S. Lindner<sup>1</sup>, Igor D. Vilfan<sup>1</sup>, Trupti Kawli<sup>1</sup>, Fred C. Christians<sup>1</sup>, Shivkumar Venkatasubrahmanyam<sup>1</sup>, Gregory D. Wall<sup>1</sup>, Anita Cheung<sup>1</sup>, Zoë N. Rogers<sup>1</sup>, Galit Meshulam-Simon<sup>1</sup>, Liza Huijse<sup>1</sup>, Sanjeev Balakrishnan<sup>1</sup>, James V. Quinn<sup>2</sup>, Desiree Hollemon <sup>1</sup>, David K. Hong<sup>1</sup>, Marla Lay Vaughn<sup>1</sup>, Mickey Kertesz<sup>1</sup>, Sivan Bercovici<sup>1</sup>, Judith C. Wilber<sup>1,3</sup> and Samuel Yang<sup>2,3</sup>

---

<sup>1</sup>Karius, Inc., Redwood City, CA, USA. <sup>2</sup>Department of Emergency Medicine, Stanford University, Palo Alto, CA, USA. <sup>3</sup>These authors contributed equally: Timothy A. Blauwkamp, Simone Thair, Judith C. Wilber, Samuel Yang. \*e-mail: [tim.blauwkamp@kariusdx.com](mailto:tim.blauwkamp@kariusdx.com)

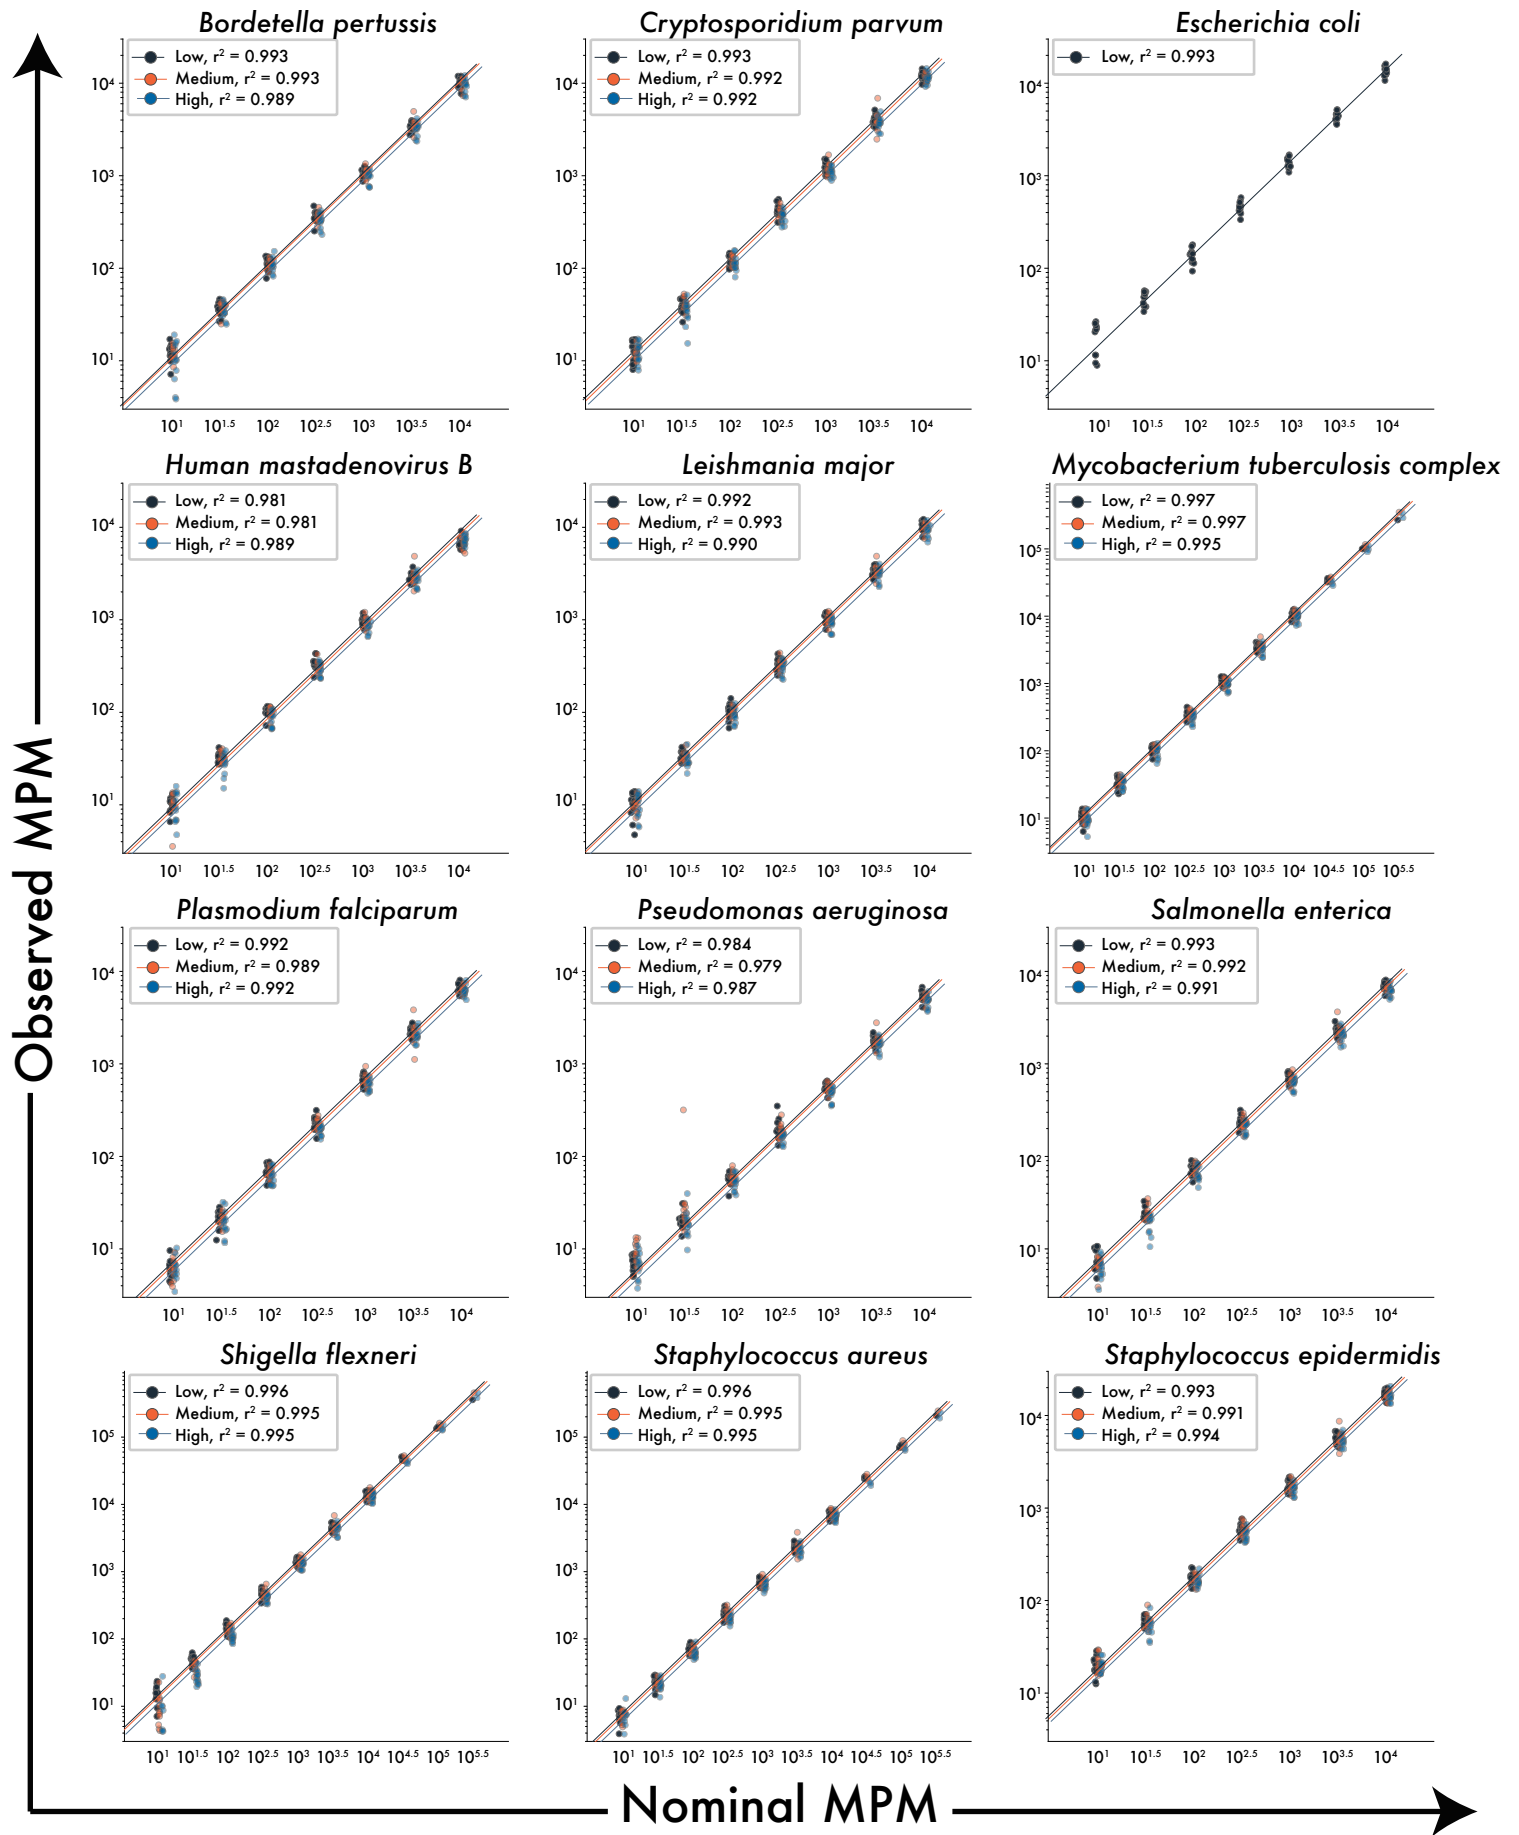

**Supplementary Figure 1. Linearity.** The correlation between nominal microbial cfDNA concentration and observed concentration is shown for each of the representative microbes not shown in Figure 3d. Each replicate (N=12) in each of the three backgrounds is represented by a dot (N=36 data points at each nominal concentration). Linear best fit regression of log-transformed MPM values showed all  $R^2$  values were greater than 0.979, with an average  $R^2$  of 0.991.

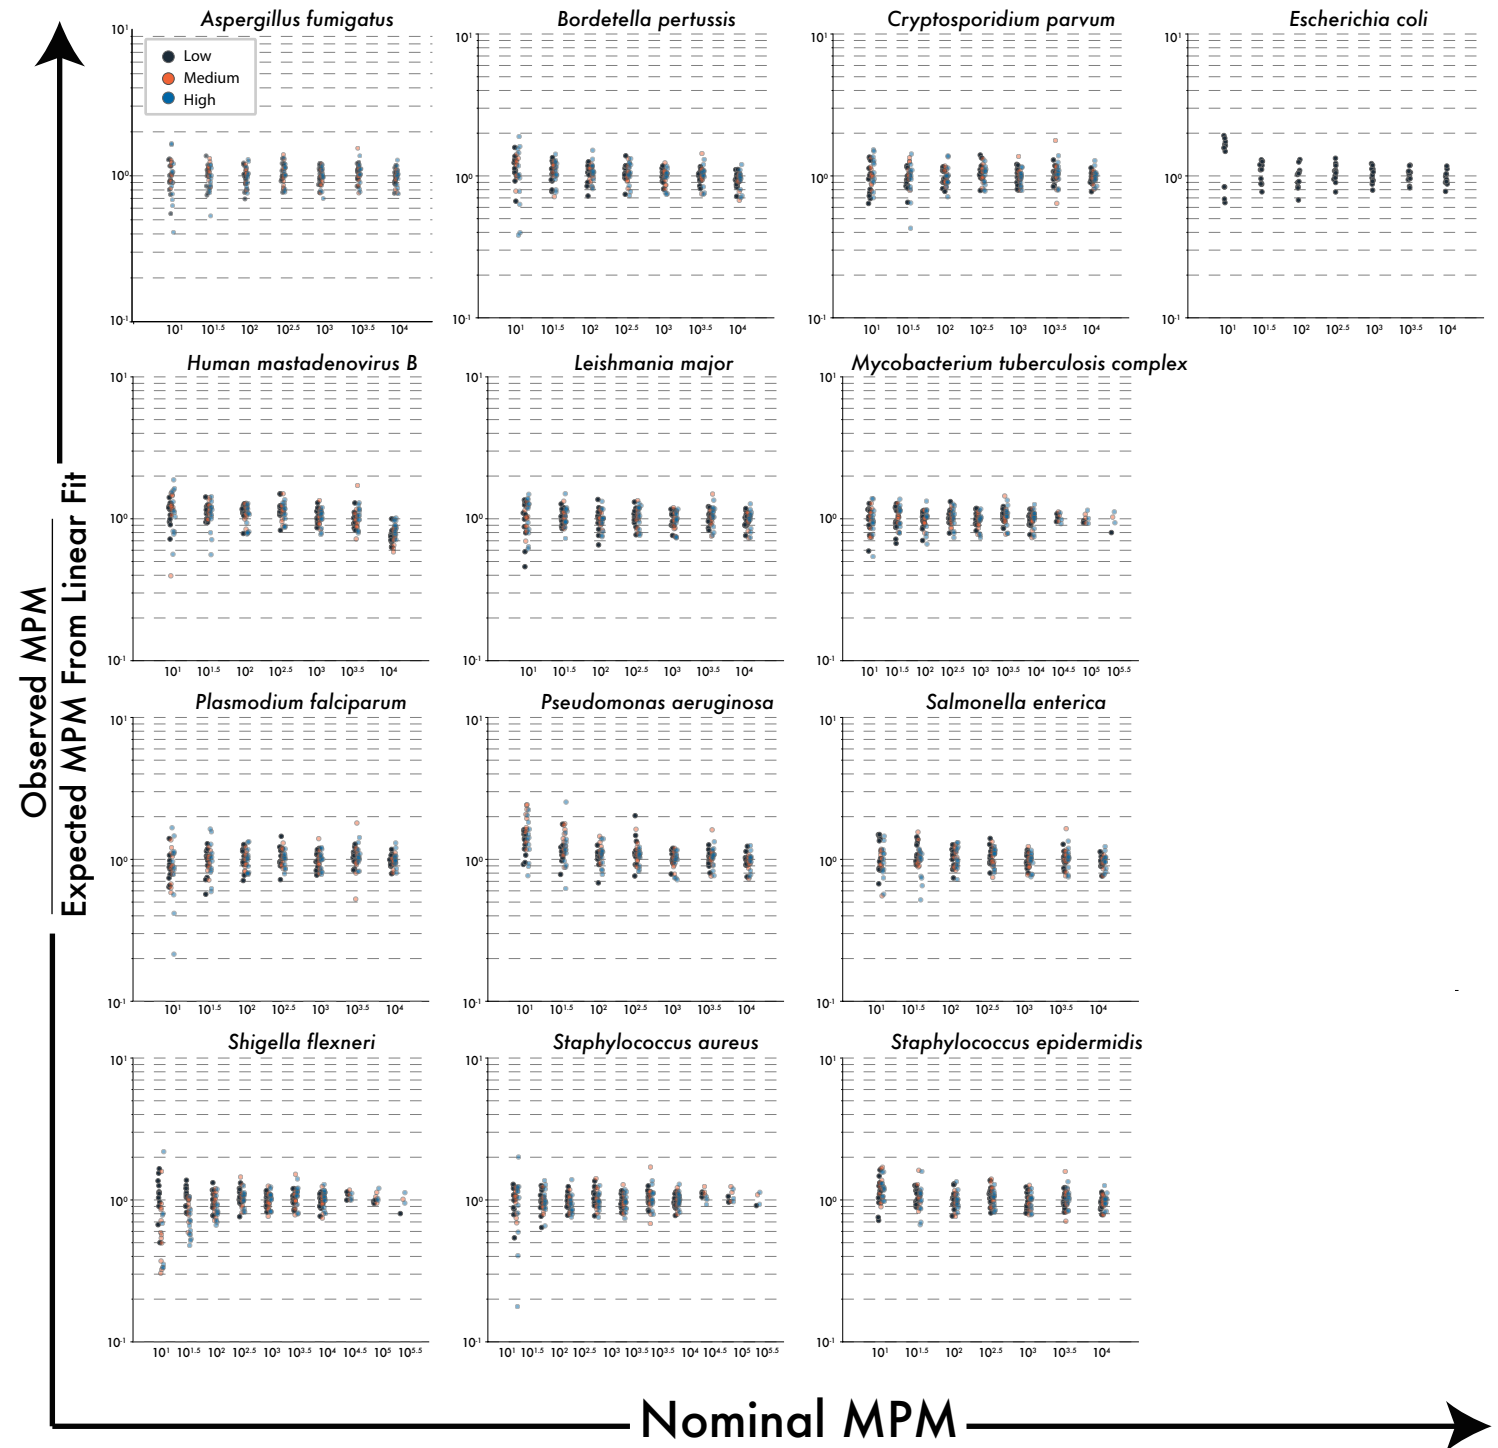

**Supplementary Figure 2. Deviation from Linearity.** The deviation from linearity as a function of nominal input concentration was assessed by plotting the ratio between observed MPM and that expected from the linear best fit regression calculated in Supplementary Figure 1 and Figure 3d. Data is shown for each of the representative microbes. Each replicate (N=12) in each of the three backgrounds is represented by a dot (N=36 data points at each nominal concentration in each panel). All microbes in all human matrices showed no systematic deviation from linearity at any concentration tested.

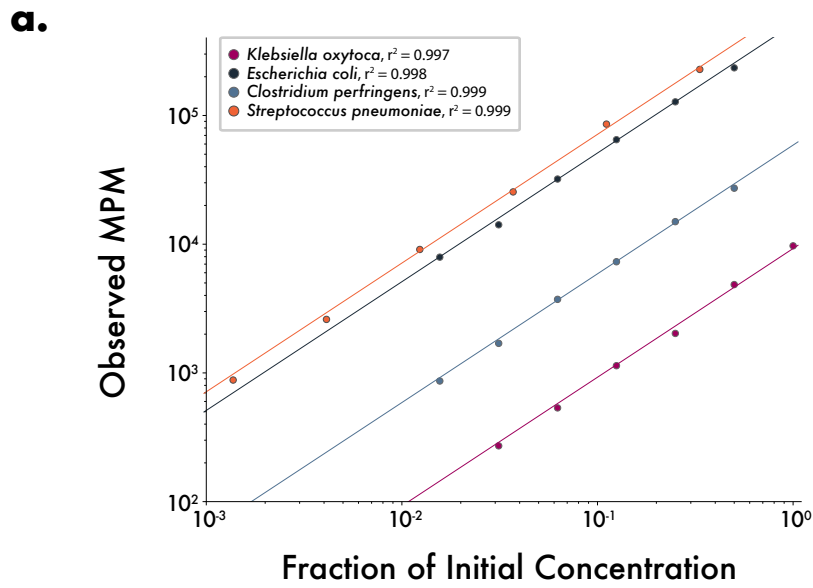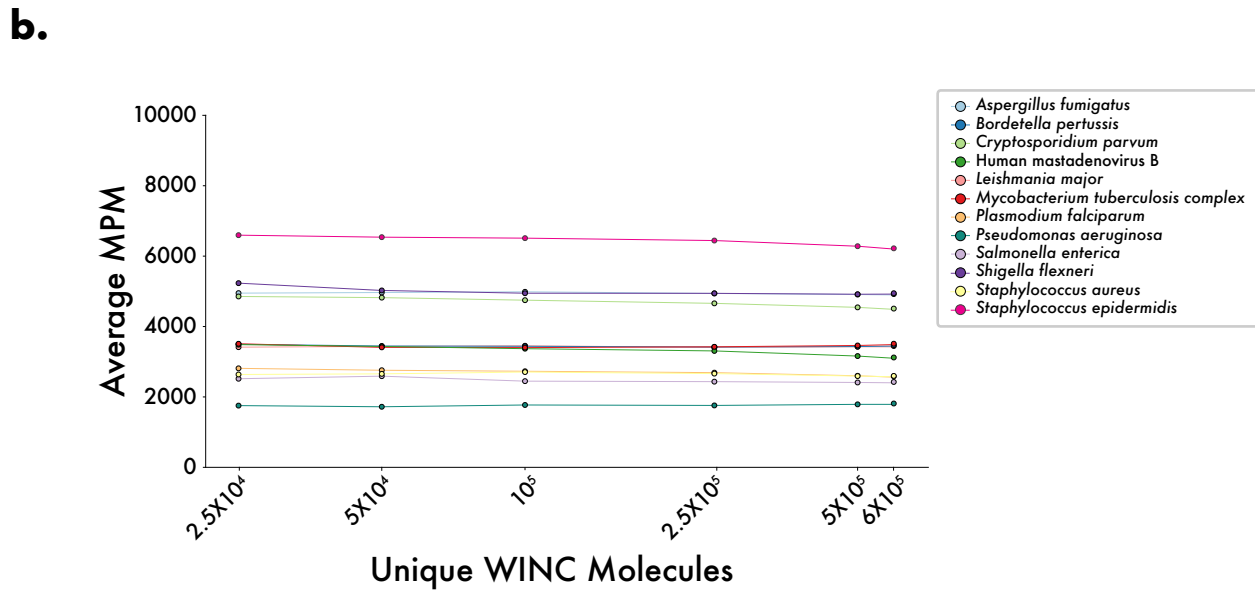

**Supplementary Figure 3. Linearity Verification.** (a) Linearity of the assay was confirmed on clinical samples using serial 2-fold or 3-fold dilutions of clinical samples with blood culture confirmed infections in healthy plasma (N=6 per sample).  $r^2$  was calculated as described in figure 3d. (b) The microbial cfDNA concentration reported by the assay at different levels of sequencing coverage, generated by subsampling, is shown for each of 12 microbes spiked into medium human background plasma matrix. Sequencing depth does not significantly affect quantification accuracy.

**a.****Med Human**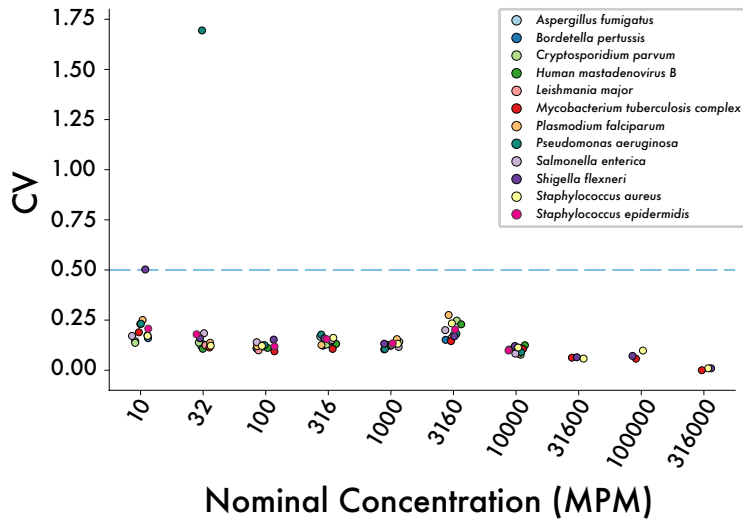**b.****High Human**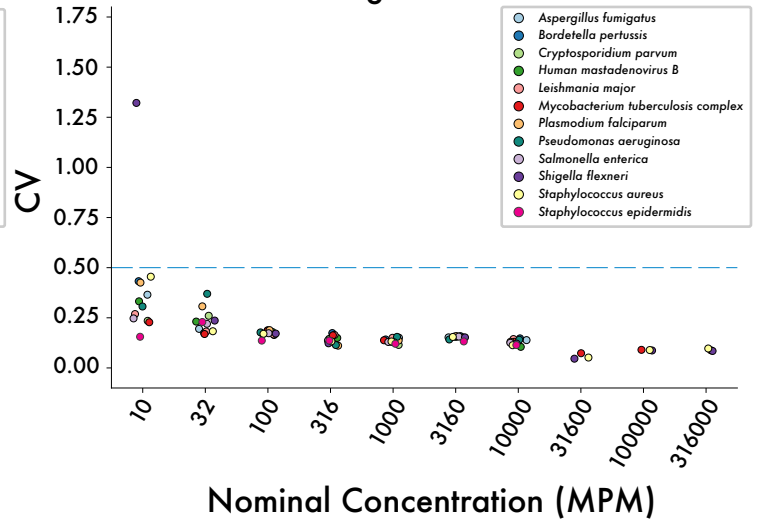

**Supplementary Figure 4. Limit of quantitation precision.** (a) Precision as a function of sequencing depth for each reference microbe is shown in medium (a) and high (b) human plasma matrices. Precision within the twelve replicate measurements is shown in a different color for each representative microbe at each nominal concentration (12 dots at each nominal concentration instead of 13 because *Escherichia coli* was excluded from these analyses due to significant *E. coli* DNA contamination of the purified mono nucleosomal DNA used to generate these human plasma matrices).

**a.**

|                                   | Qualitative<br>Reproducibility | Quantitative Precision |                 |
|-----------------------------------|--------------------------------|------------------------|-----------------|
|                                   |                                | Within Run (CV)        | Within Lab (CV) |
| <i>Plasmodium falciparum</i>      | 100%                           | 17.5%                  | 18.9%           |
| <i>Cryptosporidium parvum</i>     | 100%                           | 16.7%                  | 18.1%           |
| <i>Staphylococcus aureus</i>      | 100%                           | 17.4%                  | 17.9%           |
| <i>Staphylococcus epidermidis</i> | 100%                           | 18.5%                  | 19.2%           |
| <i>Aspergillus fumigatus</i>      | 100%                           | 17.6%                  | 20.3%           |
| <i>Escherichia coli</i>           | 100%                           | 18.7%                  | 20.9%           |
| <i>Shigella flexneri</i>          | 100%                           | 18.7%                  | 19.7%           |
| <i>Bordetella pertussis</i>       | 100%                           | 18.9%                  | 22.2%           |
| <i>Salmonella enterica</i>        | 100%                           | 18.9%                  | 18.9%           |
| <i>Leishmania major</i>           | 100%                           | 18.4%                  | 21.3%           |
| <i>Human mastadenovirus B</i>     | 100%                           | 18.1%                  | 18.9%           |
| <i>Mycobacterium tuberculosis</i> | 100%                           | 18.3%                  | 21.5%           |
| <i>Pseudomonas aeruginosa</i>     | 100%                           | 18.4%                  | 21.2%           |
| <b>Mean</b>                       | <b>100%</b>                    | <b>18.2%</b>           | <b>19.9%</b>    |

**b.**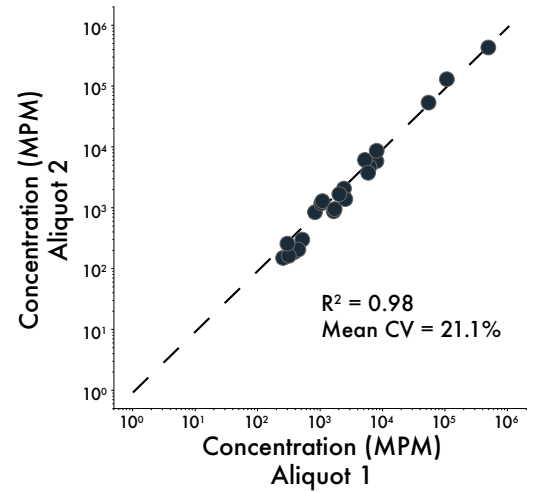

**Supplementary Figure 5. Within run and within laboratory precision.** (a) Within-run and within-laboratory precision were assessed by measuring microbial cfDNA abundance in a low human plasma matrix spiked with the representative microbial cfDNA reference materials at a nominal concentration of 1,000 MPM. Samples were processed in duplicate on each of 20 runs performed on 20 separate days by different operators using different instruments. Qualitative reproducibility indicates the fraction of tested samples with a positive result (N=40 for each microbe). Within-run repeatability and within-lab reproducibility indicate precision of the cfDNA concentration and were calculated according to CLSI EP5-A. (b) Reproducibility of the cfDNA concentration reported by the assay in clinical samples was assessed by testing 2 different aliquots of 20 different samples with known microbial infections on separate days (N=22).  $r^2$  was calculated from linear regression.

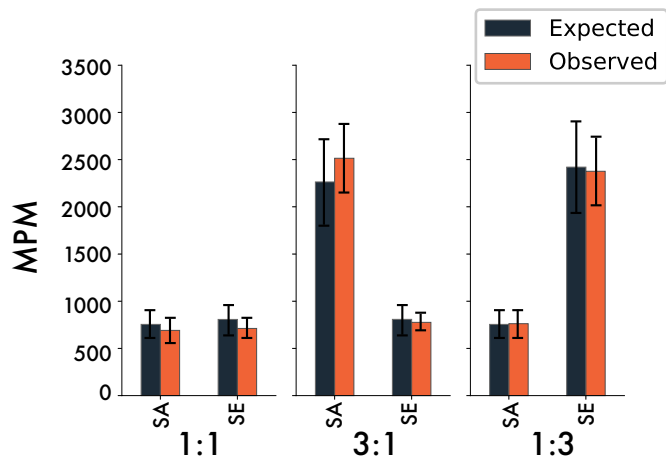

**Supplementary Figure 6. Interference.** Potential interference during co-infection was assessed using healthy human plasma samples spiked with various ratios of genetically similar microbial cfDNA reference materials. Reported plasma cfDNA concentrations are shown for *Staphylococcus epidermidis* and *Staphylococcus aureus* when co-infection is contrived at ratios of 1:1, 3:1, and 1:3, respectively. Expected plasma cfDNA concentration is calculated from samples where each organism is spiked into a sample alone. Mean is shown and error bars show the sample standard deviation of the three replicates. All P-values >0.05 in two-tailed T-test. P-values for *S. epidermidis* were 0.28, 0.87, 0.67 respectively and *S. aureus* were 0.54, 0.42, 0.95 respectively.

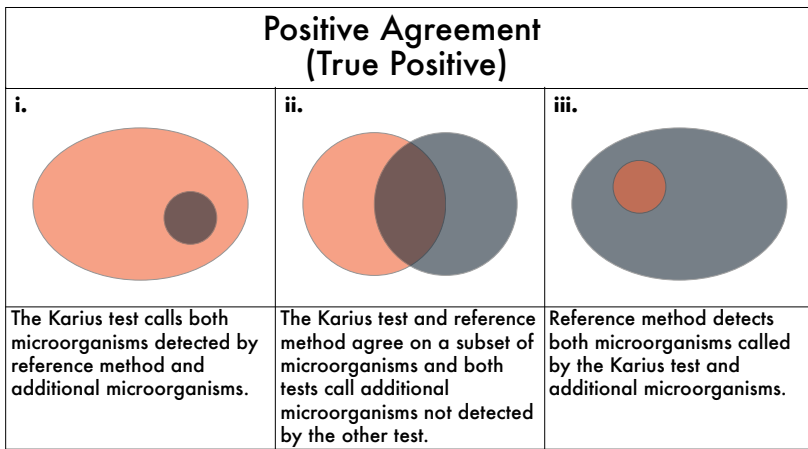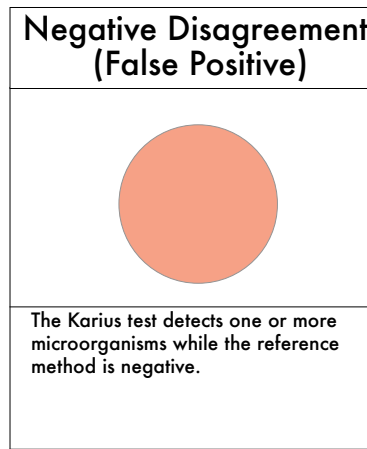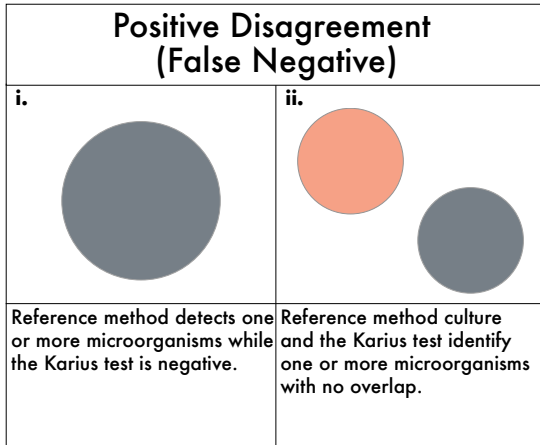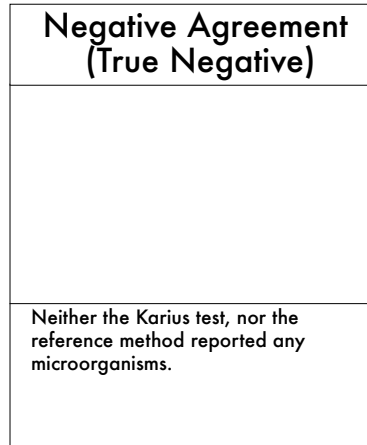

 Karius Test  
 Reference Method

**Supplementary Figure 7. Scoring structure for microbial cfDNA sequencing comparisons to blood culture and all microbiological testing.**



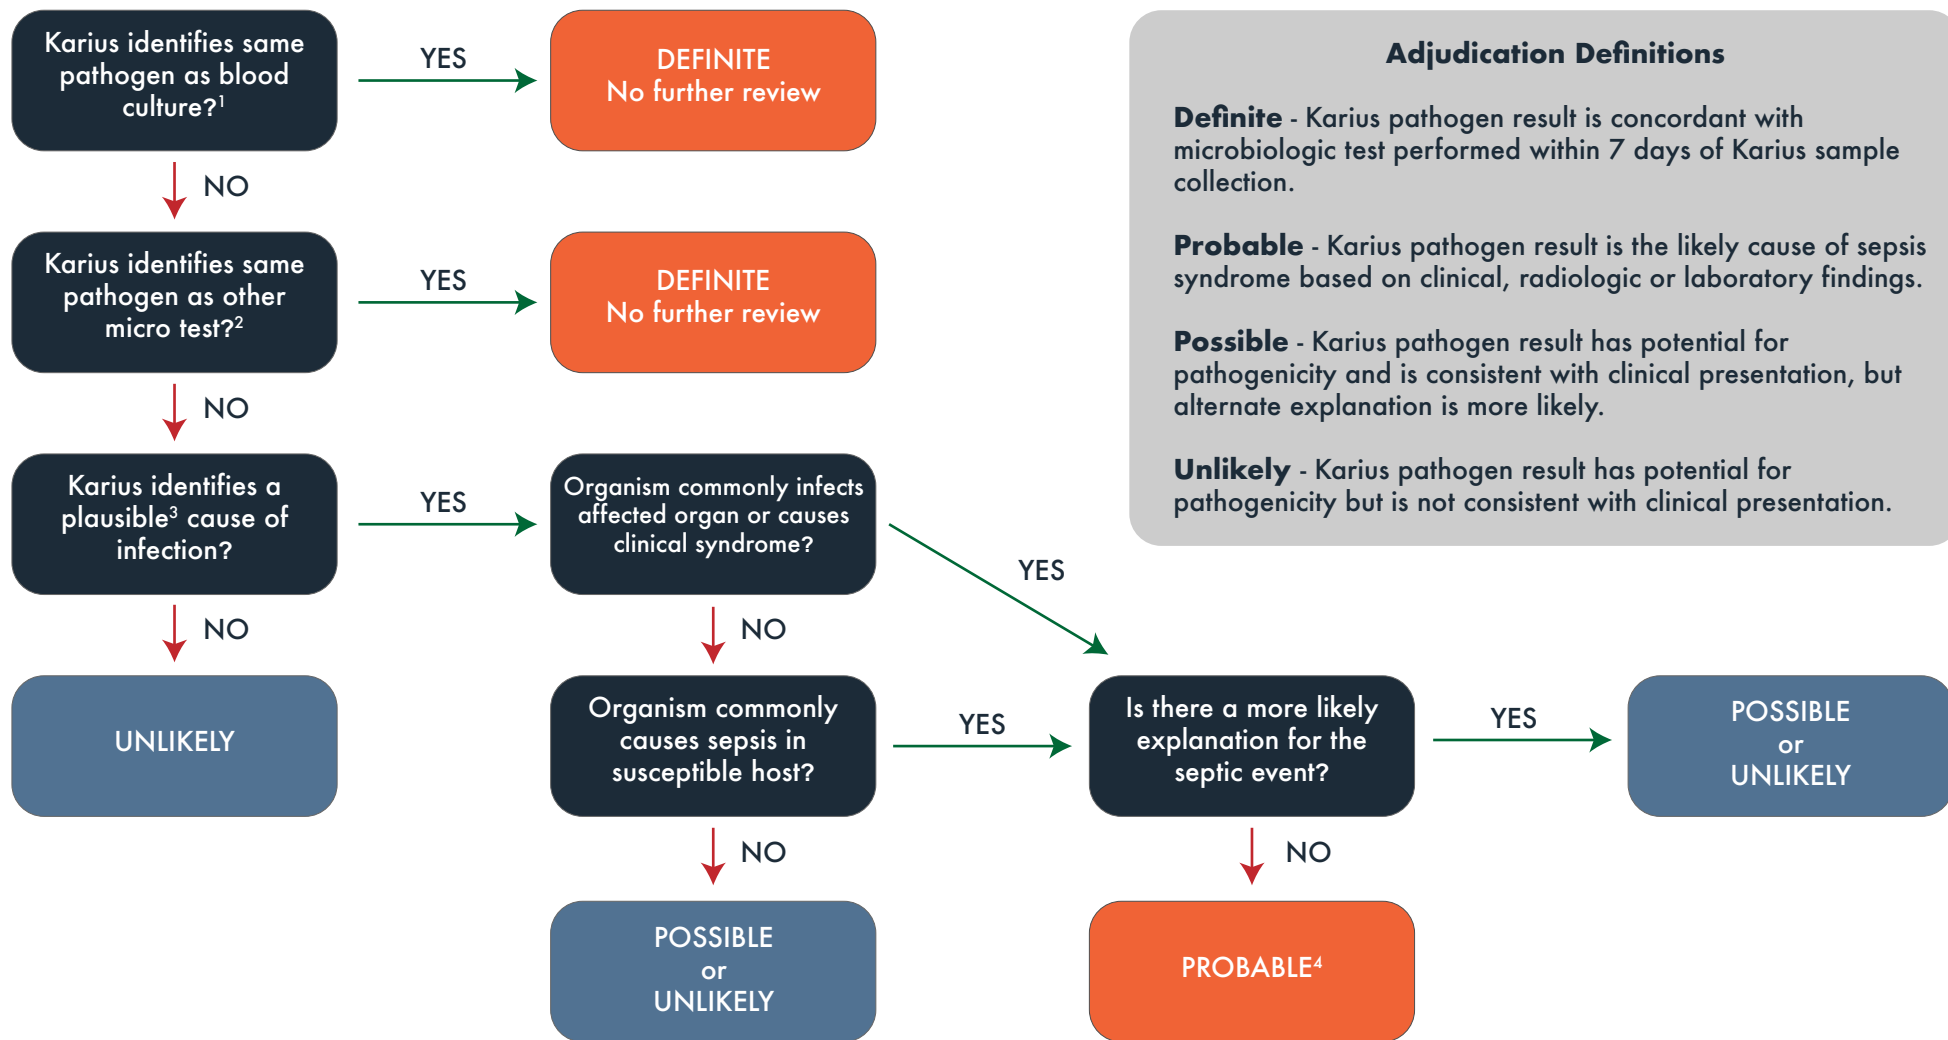

**Adjudication Definitions**

**Definite** - Karius pathogen result is concordant with microbiologic test performed within 7 days of Karius sample collection.

**Probable** - Karius pathogen result is the likely cause of sepsis syndrome based on clinical, radiologic or laboratory findings.

**Possible** - Karius pathogen result has potential for pathogenicity and is consistent with clinical presentation, but alternate explanation is more likely.

**Unlikely** - Karius pathogen result has potential for pathogenicity but is not consistent with clinical presentation.

**Supplementary Figure 8. SEP-SEQ Adjudication algorithm.**

<sup>1</sup> Blood cultures with skin contaminant pathogens and no clinical evidence of infection will be considered negative.

<sup>2</sup> Microbiologic tests include blood culture, antibody, antigen, and nucleic acid-based testing, positive tests concordant with Karius will not be adjudicated.

<sup>3</sup> "Plausible" is defined as consistent with clinical presentation and with similar syndromes reported in the literature, all plausible cases will be adjudicated.

<sup>4</sup> Patients with neutropenic fever where Karius identified a plausible pathogen, and with no documented local source of infection, may be included in Probable category.

| <b>Category</b> | <b>Phyla</b> | <b>Families</b> | <b>Genera</b> | <b>CRR taxa</b> |
|-----------------|--------------|-----------------|---------------|-----------------|
| Bacteria        | 8            | 81              | 186           | 757             |
| Fungi           | 4            | 67              | 119           | 332             |
| Viruses         | N/A          | 8               | 22            | 102             |
| Nematodes       | 1            | 10              | 14            | 17              |
| Platyhelminthes | 1            | 6               | 8             | 11              |
| Protozoans      | 1            | 10              | 14            | 30              |
| Archaea         | 1            | 1               | 1             | 1               |
| <b>Total</b>    | <b>16</b>    | <b>183</b>      | <b>364</b>    | <b>1250</b>     |

**Supplementary Table 1.** The clinically reportable range for this assay spans 1,250 taxa including culturable bacteria, additional fastidious and unculturable bacteria, fungi, DNA viruses and eukaryotic pathogens.

| Representative Microbial DNA      | Pathogen Class      | % GC | Genome Size | Common Commensal | Common EC | Source |
|-----------------------------------|---------------------|------|-------------|------------------|-----------|--------|
| <i>Aspergillus fumigatus</i>      | Eukaryotic Mold     | 50   | 29 Mb       | No               | No        | ATCC   |
| <i>Bordetella pertussis</i>       | Gram Neg Bacteria   | 68   | 4.10 Mb     | No               | No        | ATCC   |
| <i>Cryptosporidium parvum</i>     | Eukaryotic Parasite | 30   | 9.10 Mb     | No               | No        | ATCC   |
| <i>Escherichia coli</i>           | Gram Neg Bacteria   | 51   | 5.62 Mb     | Yes, Gut         | Yes       | ATCC   |
| Human mastadenovirus B            | dsDNA Virus         | 51   | 35 kb       | No               | No        | ATCC   |
| <i>Leishmania major</i>           | Eukaryotic Parasite | 63   | 33 Mb       | No               | No        | ATCC   |
| <i>Mycobacterium tuberculosis</i> | Acid Fast Bacteria  | 66   | 4.41 Mb     | No               | No        | ATCC   |
| <i>Plasmodium falciparum</i>      | Eukaryotic Parasite | 19   | 22.90 Mb    | No               | No        | ATCC   |
| <i>Pseudomonas aeruginosa</i>     | Gram Neg Bacteria   | 66   | 6.30 Mb     | Yes, Skin        | Yes       | NIST   |
| <i>Salmonella enterica</i>        | Gram Neg Bacteria   | 52   | 4.77 Mb     | No               | No        | NIST   |
| <i>Shigella flexneri</i>          | Gram Neg Bacteria   | 51   | 4.60 Mb     | No               | No        | ATCC   |
| <i>Staphylococcus aureus</i>      | Gram Pos Bacteria   | 32   | 2.80 Mb     | Yes, Nose        | No        | NIST   |
| <i>Staphylococcus epidermidis</i> | Gram Pos Bacteria   | 32   | 2.56 Mb     | Yes, Skin        | Yes       | ATCC   |

**Supplementary Table 2.** A panel of thirteen microbes was used to model the effects of several key determinants of analytical performance, including GC-content, genome size, super-kingdom, background signal from commensals, and background signal from environmental contamination. Together, this panel spans the breadth of key performance determinants found among the 1,250 microbes probed by the assay.

|                                   | LoD at 300,000 WINCs |              |              | LoD at 25,000 WINCs |              |              |
|-----------------------------------|----------------------|--------------|--------------|---------------------|--------------|--------------|
|                                   | Low Human            | Medium Human | High Human   | Low Human           | Medium Human | High Human   |
| <i>Aspergillus fumigatus</i>      | 32.99                | 32.99        | 38.62        | 325.6               | 342.7        | 357.2        |
| <i>Bordetella pertussis</i>       | 37.39                | 36.18        | 38.62        | 357.2               | 368.7        | 414.3        |
| <i>Cryptosporidium parvum</i>     | 34.87                | 32.99        | 40.02        | 325.6               | 368.7        | 368.6        |
| <i>Escherichia coli</i>           | 73.54                | N/A          | N/A          | 595.7               | N/A          | N/A          |
| <i>Human mastadenovirus B</i>     | 37.39                | 40.01        | 44.01        | 357.2               | 414.3        | 434.0        |
| <i>Leishmania major</i>           | 37.40                | 40.88        | 41.29        | 382.8               | 394.0        | 401.7        |
| <i>Mycobacterium tuberculosis</i> | 38.62                | 37.39        | 40.02        | 357.2               | 394.0        | 414.3        |
| <i>Plasmodium falciparum</i>      | 73.54                | 73.54        | 73.54        | 595.7               | 595.7        | 595.7        |
| <i>Pseudomonas aeruginosa</i>     | 415.41               | 373.42       | 131.79       | 4159.1              | 5789.0       | 1340.9       |
| <i>Salmonella enterica</i>        | 44.01                | 45.19        | 73.54        | 595.7               | 595.7        | 595.7        |
| <i>Shigella flexneri</i>          | 34.87                | 37.39        | 73.54        | 342.7               | 357.2        | 368.6        |
| <i>Staphylococcus aureus</i>      | 73.54                | 73.54        | 103.04       | 595.7               | 595.7        | 1031.0       |
| <i>Staphylococcus epidermidis</i> | 36.18                | 41.29        | 44.01        | 342.7               | 394.0        | 401.7        |
| <b>Median</b>                     | <b>37.39</b>         | <b>40.45</b> | <b>44.01</b> | <b>357.2</b>        | <b>394.0</b> | <b>414.3</b> |

**Supplementary Table 3. Limit of detection per microbe.** The limit of detection (LoD) was determined using sheared microbial cfDNA reference materials for each of the 13 representative pathogens mixed together at nominally identical concentrations and spiked into low, medium, and high human matrices over seven 0.5-log serial dilutions ranging from 10,000 molecules per microliter plasma (MPM) to 10 MPM. Twelve replicates of each concentration in each healthy plasma matrix were measured over twelve different days, by different operators, using different instruments, to determine the fraction of expected microbes that were detected. The LoD determined for each representative microbe, in each plasma matrix, after down-sampling sequencing depth to levels typically found in clinical batches (300,000 unique WINC molecules) or minimum acceptable sequencing depth (25,000 unique WINC molecules) are listed.

| <b>Characteristic</b>                                                     | <b>Data (N=350)</b> |
|---------------------------------------------------------------------------|---------------------|
| <b>Age, median (range), years</b>                                         | 54 (18-97)          |
| <b>Sex, n (%)</b>                                                         |                     |
| Male                                                                      | 179 (51.1)          |
| Female                                                                    | 171 (48.9)          |
| <b>Race, n (%)</b>                                                        |                     |
| White                                                                     | 197 (56.3)          |
| Asian                                                                     | 74 (21.1)           |
| Black or African American                                                 | 15 (4.3)            |
| Native Hawaiian or other Pacific Islander                                 | 7 (2)               |
| American Indian or Alaskan Native                                         | 1 (0.3)             |
| Not reported                                                              | 55 (15.7)           |
| <b>Medical Comorbidities, n (%)</b>                                       |                     |
| ≥ 1 concurrent chronic medical condition                                  | 227 (64.9)          |
| Hypertension                                                              | 97 (27.7)           |
| Diabetes mellitus                                                         | 61 (17.4)           |
| Chronic heart disease                                                     | 54 (15.4)           |
| Hyperlipidemia                                                            | 53 (15.1)           |
| <b>Length of Hospital Stay</b>                                            |                     |
| Mean length of stay in days, n (range)                                    | 4.7 (1-117)         |
| Median length of stay in days, n (IQR)                                    | 3 (1-5)             |
| <b>Hospitalization Survival Status, n (%)</b>                             |                     |
| Discharged                                                                | 346 (98.9)          |
| Died                                                                      | 4 (1.1)             |
| <b>Antimicrobial treatment<sup>1</sup> within 2 weeks of sepsis alert</b> | 97 (27.7)           |

**Supplementary Table 4. Summary of patient demographics and clinical characteristics.**

<sup>1</sup>Antimicrobial treatment count includes patients with antibiotic, antiviral, and antifungal therapy and one patient not included in the primary analysis.

| <b>CRR Taxon Name</b>                         | <b>Mean MPM</b> | <b>Median MPM</b> | <b>97.5<sup>th</sup> Percentile of MPM</b> | <b>Fraction of Samples With a Positive Call</b> |
|-----------------------------------------------|-----------------|-------------------|--------------------------------------------|-------------------------------------------------|
| <i>Helicobacter pylori</i>                    | 3.95            | 0.00              | 47.43                                      | 0.07                                            |
| <i>Klebsiella pneumoniae</i>                  | 3.99            | 0.00              | 27.63                                      | 0.02                                            |
| <i>Haemophilus influenzae</i>                 | 2.64            | 0.00              | 23.53                                      | 0.02                                            |
| <i>Enterobacter cloacae complex</i>           | 4.05            | 1.05              | 27.78                                      | 0.02                                            |
| <i>Aureobasidium pullulans</i>                | 1.44            | 0.00              | 2.49                                       | 0.01                                            |
| <i>Bacteroides ovatus</i>                     | 1.09            | 0.00              | 2.30                                       | 0.01                                            |
| <i>Micrococcus lylae</i>                      | 0.90            | 0.00              | 1.34                                       | 0.01                                            |
| <i>Fusobacterium necrophorum</i>              | 1.94            | 0.00              | 0.95                                       | 0.01                                            |
| <i>Agrobacterium tumefaciens</i>              | 22.73           | 2.99              | 91.62                                      | 0.01                                            |
| <i>Pseudomonas putida</i>                     | 31.75           | 26.23             | 65.14                                      | 0.01                                            |
| <i>Escherichia coli</i>                       | 6.94            | 4.22              | 15.15                                      | 0.01                                            |
| <i>Streptococcus mitis</i>                    | 3.47            | 1.70              | 11.43                                      | 0.01                                            |
| <i>Rothia mucilaginosa</i>                    | 1.38            | 0.73              | 6.75                                       | 0.01                                            |
| <i>Pseudomonas fluorescens</i>                | 0.99            | 0.00              | 4.25                                       | 0.01                                            |
| <i>Gemella haemolysans</i>                    | 0.70            | 0.00              | 3.97                                       | 0.01                                            |
| <i>Staphylococcus aureus</i>                  | 0.35            | 0.00              | 2.22                                       | 0.01                                            |
| <i>Corynebacterium kroppenstedtii</i>         | 0.39            | 0.00              | 1.91                                       | 0.01                                            |
| <i>Aeromonas caviae</i>                       | 0.41            | 0.00              | 1.68                                       | 0.01                                            |
| <i>Pseudomonas oryzihabitans</i>              | 0.27            | 0.00              | 1.27                                       | 0.01                                            |
| <i>Human herpesvirus 4</i>                    | 0.27            | 0.00              | 1.18                                       | 0.01                                            |
| <i>Acinetobacter radioresistens</i>           | 0.23            | 0.00              | 1.13                                       | 0.01                                            |
| <i>Debaryomyces hansenii</i>                  | 0.29            | 0.00              | 0.99                                       | 0.01                                            |
| <i>Lactobacillus plantarum</i>                | 0.27            | 0.00              | 0.90                                       | 0.01                                            |
| <i>Neisseria gonorrhoeae</i>                  | 0.52            | 0.00              | 0.43                                       | 0.01                                            |
| [ <i>Clostridium</i> ] <i>clostridioforme</i> | 0.25            | 0.00              | 0.00                                       | 0.01                                            |
| <i>Pichia kudriavzevii</i>                    | 0.08            | 0.00              | 0.00                                       | 0.01                                            |

**Supplementary Table 8. Reference Interval Microbes Detection Frequency.** Reference interval data from 167 asymptomatic individuals were characterized, including mean MPM, median MPM, 97.5<sup>th</sup> percentile MPM, and fraction of samples with a positive call for each analyte. All analytes that were called in any asymptomatic sample are included in this table.

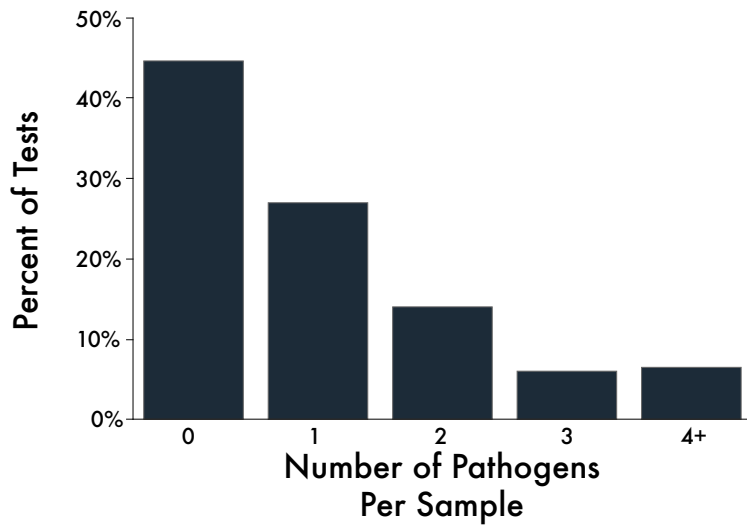

**Supplementary Figure 9. Analysis of the first 2,000 samples in clinical practice.** Frequency of polymicrobial results in the first 2,000 samples.
